# Supplementary material for: ECR-MAPK Regulation in Liver Early Development
Source: Biomed Res Int. 2014 Dec 18;2014:850802. doi: 10.1155/2014/850802 (PMC4281454; doi:10.1155/2014/850802)
Supplement: Supplementary file 1 — Supplementary Table 1: Coexpressing genes between 16 weeks and 3 weeks old. Supplementary Table 2: Correlation coefficients of genes network. [file 850802.f1.xls]

## Sheet: ST1
Supplementary Table 1. Coexpressing genes between 16 weeks and 3 weeks old
Public ID	Gene Title	Gene Symbol	p	fold
AI030888			0.992	1.0001
BI297467			0.998	1.0001
AI111675	similar to olfactory receptor 873	LOC687016	0.993	1.0001
AW918717			0.998	1.0001
AW535083			0.994	1.0001
AI549538			0.997	1.0001
BF404957			0.998	1.0001
BM388084			0.998	1.0001
BF410185			0.991	1.0001
BI274499	similar to 2610317D23Rik protein	RGD1565411	0.995	1.0001
BF390223			0.996	1.0001
NM_031753	activated leukocyte cell adhesion molecule	Alcam	0.996	1.0001
AI229702	Guanine nucleotide binding protein-like 3 (nucleolar)-like	Gnl3l	0.989	1.0001
BM388545			0.997	1.0001
AI412886			0.997	1.0001
NM_019198	fibroblast growth factor 17	Fgf17	0.998	1.0001
BF283692	keratin 5	Krt5	0.996	1.0001
AI410333			0.994	1.0001
AA998190			0.998	1.0001
AF077000	protein tyrosine phosphatase, non-receptor type 23	Ptpn23	0.997	1.0001
NM_031052	mitochondrial intermediate peptidase	Mipep	0.995	1.0001
BE113287	receptor-like tyrosine kinase	Ryk	0.997	1
J04024	ATPase, Ca2+ transporting, cardiac muscle, slow twitch 2	Atp2a2	0.999	1
AI407797			0.998	1
AI709592	receptor (chemosensory) transporter protein 3	Rtp3	0.997	1
BI296636			0.999	1
BI289495	cleavage stimulation factor, 3' pre-RNA subunit 2	Cstf2	0.997	1
AI144856			0.999	1
BE095868	Type II keratin Kb15	Kb15	0.998	1
AI072025			0.998	1
BF521686			0.997	1
AW251681			0.999	1
AI599545			0.999	1
AW918614	spectrin, beta, non-erythrocytic 1	Sptbn1	0.998	1
BF397951			0.998	1
U94321	growth hormone secretagogue receptor	Ghsr	0.999	1
BF403330			0.999	1
BF290937	L-2-hydroxyglutarate dehydrogenase	L2hgdh	0.999	1
AW254527			1	1
BF398826			1	1
BF289260	similar to hypothetical protein CG003	RGD1307034	1	1
AI603162	DET1 and DDB1 associated 1	Dda1	1	1
AW522852			1	1
BI292153	spermine oxidase	Smox	1	1
BE103179	LEM domain containing 2	Lemd2	1	1
BE103050	Oxoglutarate (alpha-ketoglutarate) dehydrogenase (lipoamide)	Ogdh	0.999	1
BE112983	golgi associated, gamma adaptin ear containing, ARF binding protein 3	Gga3	0.999	1
BM392082			1	1
BI280344	coiled coil domain containing 28B	Ccdc28b	0.999	1
BM384409	progestin and adipoQ receptor family member V	Paqr5	0.999	1
NM_032084	chimerin (chimaerin) 2	Chn2	0.999	1
BF392367			1	1
BG380882	glutaminyl-tRNA synthetase /// similar to glutaminyl-tRNA synthetase	Qars /// RGD1562301	0.997	1
BF283857			0.999	1
BF286880	Nudix (nucleoside diphosphate linked moiety X)-type motif 5	Nudt5	0.999	1
BI300887			0.999	1
AI059587			0.999	1
BI281621	ring finger protein 187	Rnf187	0.998	1
AW916118	cyclin-dependent kinase 7	Cdk7	0.999	1
BF411424	coiled-coil domain containing 12	Ccdc12	0.998	1
AA998044	neuron navigator 2	Nav2	0.998	1
AI101329	RAB33A, member of RAS oncogene family	Rab33a	0.998	1
AW919585			0.998	1
AW144823	sortilin-related receptor, LDLR class A repeats-containing	Sorl1	0.999	1
NM_031030	cyclin G associated kinase	Gak	0.995	1
NM_017068	lysosomal-associated membrane protein 2	Lamp2	0.966	1
BF413486	similar to Chromodomain-helicase-DNA-binding protein 1 (CHD-1)	RGD1310166	0.997	0.9999
AI145819			0.998	0.9999
BF284283	elastase 3B, pancreatic	Ela3b	0.997	0.9999
BI275310	ninein-like	Nlp	0.997	0.9999
BI287258			0.996	0.9999
AI137070			0.998	0.9999
NM_017078	cholinergic receptor, nicotinic, alpha 5	Chrna5	0.997	0.9999
BE105470			0.998	0.9999
BG381740	COP9 constitutive photomorphogenic homolog subunit 7A (Arabidopsis)	Cops7a	0.991	0.9999
NM_031657	G protein-coupled receptor kinase 6	Grk6	0.992	0.9999
AI013512	zinc finger and BTB domain containing 43	Zbtb43	0.995	0.9999
BF402416			0.999	0.9999

## Sheet: ST2
Figure 1 No.		1	2	3	4	5	6	7	8	9	10	11	12	13	14	15	16	17	18	19	20	21	22	23	24	25	26	27	28	29	30	31	32	33	34	35	36	37	38	39	40	41	42	43	44	45	46	47	48
	genes	Obp3	Obp3	LOC680367 /// LOC680406 /// Rup2	Rup2	Hsd3b5	Dhrs7	LOC680367 /// Rup2	Cyp2c13	LOC680367	LOC259245 /// LOC259246 /// Mup5	Cyp3a9	LOC259246	Cyp2a2	Hao2	Sult1e1	Ust5r	Akr1c1	Mup5	Stac3	Cyp2c	Nox4	Zfp37	Inmt	RGD1310209	Lrtm2	Dusp1	RGD1564865	Hrasls	Mup5	Mettl7b	RGD1560784	Ppp2r2a	Socs2	Cdh17	Mme	RGD1308116	RGD1306105	RT1-CE5	Pcdh17	Cyp2c12	Abcg8	Cyp17a1	Abcd2	Ccna2	Asns	LOC685203	A2m	Lum
1	Obp3	1	0.999159	0.995282	0.98676	0.998872	0.997969	0.96849	0.993871	0.975299	0.999123	0.993378	0.999198	0.998662	0.988091	0.993991	0.987204	0.988971	0.98495	0.989845	0.989555	0.974802	0.980498	0.982851	0.984522	0.892962	0.910796	0.990301	0.955677	0.92289	0.995164	0.947787	0.995478	0.970687	0.831603	0.960666	0.98477	0.974246	0.636823	-0.920531	-0.9888	-0.873919	-0.99429	-0.967842	-0.938895	-0.93321	-0.949404	-0.984343	-0.915647
2	Obp3	0.999159	1	0.995524	0.983329	0.999378	0.998823	0.964807	0.990468	0.972788	0.998847	0.994329	0.999376	0.998876	0.986223	0.99159	0.984127	0.988912	0.985328	0.987662	0.988392	0.972258	0.984332	0.981146	0.984425	0.900356	0.910166	0.987376	0.954676	0.92211	0.995482	0.947085	0.997162	0.967609	0.841129	0.960102	0.98652	0.975348	0.64797	-0.923147	-0.988853	-0.864827	-0.995642	-0.965579	-0.94284	-0.925717	-0.947234	-0.983326	-0.914586
3	LOC680367 /// LOC680406 /// Rup2	0.995282	0.995524	1	0.985958	0.996488	0.993165	0.969485	0.993362	0.975535	0.99655	0.992116	0.995219	0.995999	0.983046	0.991652	0.985856	0.987587	0.979558	0.992533	0.988383	0.956832	0.989844	0.966118	0.989258	0.915208	0.897067	0.993504	0.955804	0.890098	0.993887	0.955893	0.993151	0.960746	0.807408	0.948852	0.984371	0.971924	0.646095	-0.929004	-0.983517	-0.886884	-0.98729	-0.976515	-0.950152	-0.932406	-0.941603	-0.985857	-0.912826
4	Rup2	0.98676	0.983329	0.985958	1	0.982769	0.9843	0.995571	0.997135	0.99684	0.985	0.981876	0.981766	0.983905	0.996382	0.994085	0.996759	0.979324	0.969038	0.997856	0.995436	0.95907	0.97123	0.979363	0.989393	0.896178	0.898326	0.98903	0.938233	0.895196	0.984789	0.9506	0.976792	0.969301	0.789162	0.951423	0.982406	0.943026	0.625727	-0.913549	-0.96605	-0.919944	-0.980443	-0.985081	-0.941042	-0.970396	-0.954735	-0.969166	-0.866179
5	Hsd3b5	0.998872	0.999378	0.996488	0.982769	1	0.998333	0.963304	0.990577	0.971386	0.998893	0.993388	0.999136	0.998628	0.983878	0.992245	0.982916	0.990811	0.984824	0.987279	0.987689	0.966197	0.982476	0.976825	0.985513	0.89545	0.902167	0.990373	0.962604	0.912359	0.996515	0.948878	0.99636	0.963895	0.826279	0.951781	0.982696	0.977683	0.635285	-0.919464	-0.990749	-0.862912	-0.995137	-0.964917	-0.938521	-0.926536	-0.940966	-0.986195	-0.920059
6	Dhrs7	0.997969	0.998823	0.993165	0.9843	0.998333	1	0.966914	0.989344	0.97476	0.996107	0.99293	0.996941	0.998098	0.988682	0.992526	0.985189	0.985627	0.978932	0.98635	0.990812	0.972775	0.983079	0.981793	0.98472	0.902661	0.910681	0.98492	0.952908	0.918615	0.994943	0.950747	0.995156	0.96556	0.84473	0.955724	0.987941	0.967469	0.631448	-0.913	-0.985649	-0.861608	-0.997202	-0.965679	-0.936432	-0.932011	-0.943518	-0.982795	-0.906255
7	LOC680367 /// Rup2	0.96849	0.964807	0.969485	0.995571	0.963304	0.966914	1	0.986204	0.998766	0.966628	0.964678	0.961892	0.965383	0.991109	0.982233	0.991086	0.963175	0.951698	0.991018	0.98875	0.941234	0.957492	0.970365	0.982811	0.890513	0.886729	0.974544	0.916528	0.875544	0.968892	0.943238	0.958179	0.956769	0.769787	0.939876	0.972495	0.915016	0.620086	-0.902226	-0.943999	-0.931398	-0.963353	-0.980668	-0.938265	-0.977599	-0.947922	-0.949515	-0.820779
8	Cyp2c13	0.993871	0.990468	0.993362	0.997135	0.990577	0.989344	0.986204	1	0.988981	0.992994	0.988339	0.990468	0.991103	0.993006	0.995667	0.994871	0.985538	0.976993	0.997943	0.993049	0.964948	0.976701	0.97765	0.988548	0.896517	0.900213	0.994792	0.94775	0.901198	0.9896	0.950043	0.984447	0.973348	0.794855	0.955284	0.982945	0.960146	0.631731	-0.923613	-0.976548	-0.913462	-0.984484	-0.984074	-0.94057	-0.956574	-0.954483	-0.977984	-0.895942
9	LOC680367	0.975299	0.972788	0.975535	0.99684	0.971386	0.97476	0.998766	0.988981	1	0.974045	0.970468	0.970063	0.971675	0.994661	0.98562	0.991068	0.971149	0.958866	0.992927	0.990795	0.947913	0.963403	0.975271	0.986003	0.894155	0.894677	0.978737	0.925599	0.881669	0.974321	0.947164	0.965488	0.965237	0.786437	0.946186	0.978343	0.926475	0.619698	-0.910318	-0.954689	-0.924408	-0.971102	-0.981846	-0.940363	-0.971124	-0.946034	-0.9582	-0.835776
10	LOC259245 /// LOC259246 /// Mup5	0.999123	0.998847	0.99655	0.985	0.998893	0.996107	0.966628	0.992994	0.974045	1	0.992799	0.999658	0.997588	0.984933	0.992276	0.984389	0.992159	0.988963	0.990005	0.986935	0.968656	0.980874	0.97975	0.985182	0.890896	0.906225	0.991979	0.959774	0.918174	0.995195	0.945978	0.995792	0.969443	0.823293	0.959305	0.982256	0.979584	0.645835	-0.926845	-0.991163	-0.873477	-0.992346	-0.96685	-0.94406	-0.927853	-0.947304	-0.984835	-0.9195
11	Cyp3a9	0.993378	0.994329	0.992116	0.981876	0.993388	0.99293	0.964678	0.988339	0.970468	0.992799	1	0.992722	0.994264	0.981274	0.988025	0.982333	0.98762	0.983815	0.986771	0.98567	0.959133	0.983934	0.972489	0.978515	0.909418	0.880418	0.986116	0.944771	0.920718	0.993082	0.921824	0.988994	0.96274	0.815299	0.950182	0.984008	0.97224	0.704033	-0.92482	-0.972872	-0.864365	-0.994455	-0.975395	-0.939429	-0.927405	-0.965193	-0.963212	-0.920534
12	LOC259246	0.999198	0.999376	0.995219	0.981766	0.999136	0.996941	0.961892	0.990468	0.970063	0.999658	0.992722	1	0.997941	0.983333	0.990814	0.981837	0.990436	0.98813	0.986844	0.985179	0.971493	0.980604	0.980228	0.982248	0.890715	0.909544	0.988989	0.957753	0.923248	0.994616	0.944221	0.996522	0.968636	0.833313	0.960619	0.982488	0.979556	0.645988	-0.923649	-0.991339	-0.863954	-0.993326	-0.962747	-0.941793	-0.922607	-0.946114	-0.984379	-0.921865
13	Cyp2a2	0.998662	0.998876	0.995999	0.983905	0.998628	0.998098	0.965383	0.991103	0.971675	0.997588	0.994264	0.997941	1	0.985178	0.993026	0.987466	0.985615	0.982637	0.98849	0.990829	0.970525	0.98557	0.979006	0.986369	0.902828	0.906861	0.987724	0.954523	0.918953	0.996953	0.951598	0.997887	0.959306	0.83346	0.955337	0.98517	0.971571	0.64405	-0.916763	-0.986159	-0.866924	-0.994644	-0.965149	-0.943782	-0.931489	-0.948497	-0.983541	-0.909306
14	Hao2	0.988091	0.986223	0.983046	0.996382	0.983878	0.988682	0.991109	0.993006	0.994661	0.984933	0.981274	0.983333	0.985178	1	0.990428	0.99433	0.975089	0.965561	0.992631	0.994847	0.972718	0.973061	0.986525	0.986413	0.901249	0.915497	0.979687	0.929825	0.908614	0.982302	0.952474	0.979498	0.975855	0.83446	0.961363	0.988644	0.940647	0.615636	-0.91788	-0.968356	-0.911604	-0.984472	-0.978923	-0.935906	-0.958138	-0.949671	-0.969991	-0.858824
15	Sult1e1	0.993991	0.99159	0.991652	0.994085	0.992245	0.992526	0.982233	0.995667	0.98562	0.992276	0.988025	0.990814	0.993026	0.990428	1	0.992829	0.983616	0.976873	0.995058	0.995021	0.963972	0.976646	0.980579	0.987195	0.896299	0.908937	0.99322	0.949656	0.908785	0.994187	0.955266	0.987705	0.961113	0.794236	0.953472	0.984055	0.953199	0.631392	-0.891983	-0.975693	-0.878879	-0.988511	-0.974496	-0.947806	-0.965626	-0.955447	-0.979651	-0.893468
16	Ust5r	0.987204	0.984127	0.985856	0.996759	0.982916	0.985189	0.991086	0.994871	0.991068	0.984389	0.982333	0.981837	0.987466	0.99433	0.992829	1	0.973519	0.967984	0.995837	0.997944	0.962799	0.974885	0.980761	0.991628	0.899228	0.900316	0.98403	0.936045	0.902729	0.98716	0.956368	0.982303	0.956728	0.80377	0.9504	0.981712	0.941403	0.625502	-0.911825	-0.965939	-0.916076	-0.981269	-0.976915	-0.944109	-0.966369	-0.955631	-0.96947	-0.854633
17	Akr1c1	0.988971	0.988912	0.987587	0.979324	0.990811	0.985627	0.963175	0.985538	0.971149	0.992159	0.98762	0.990436	0.985615	0.975089	0.983616	0.973519	1	0.992517	0.983495	0.977852	0.938553	0.962256	0.969867	0.981523	0.857535	0.857428	0.991868	0.975864	0.900693	0.99073	0.917945	0.982521	0.961391	0.772105	0.93112	0.962969	0.986403	0.654169	-0.928991	-0.987238	-0.865667	-0.988505	-0.962056	-0.924559	-0.920873	-0.939038	-0.968562	-0.922587
18	Mup5	0.98495	0.985328	0.979558	0.969038	0.984824	0.978932	0.951698	0.976993	0.958866	0.988963	0.983815	0.98813	0.982637	0.965561	0.976873	0.967984	0.992517	1	0.976622	0.970402	0.943986	0.956566	0.976286	0.971366	0.843806	0.869452	0.980987	0.960661	0.934127	0.987206	0.903432	0.984282	0.951236	0.78677	0.945589	0.957223	0.984661	0.698681	-0.921262	-0.982695	-0.843101	-0.982813	-0.943031	-0.93985	-0.909431	-0.954592	-0.956607	-0.913141
19	Stac3	0.989845	0.987662	0.992533	0.997856	0.987279	0.98635	0.991018	0.997943	0.992927	0.990005	0.986771	0.986844	0.98849	0.992631	0.995058	0.995837	0.983495	0.976622	1	0.994871	0.956884	0.980426	0.976237	0.991718	0.906751	0.899633	0.992911	0.942207	0.895963	0.989388	0.952865	0.983703	0.965747	0.788829	0.955004	0.984686	0.952802	0.651865	-0.921268	-0.970797	-0.913766	-0.981679	-0.985253	-0.955915	-0.962743	-0.958384	-0.973563	-0.878559
20	Cyp2c	0.989555	0.988392	0.988383	0.995436	0.987689	0.990812	0.98875	0.993049	0.990795	0.986935	0.98567	0.985179	0.990829	0.994847	0.995021	0.997944	0.977852	0.970402	0.994871	1	0.960665	0.979269	0.981852	0.994294	0.904696	0.900612	0.984836	0.943882	0.901961	0.992053	0.959991	0.986741	0.953996	0.811121	0.947256	0.985229	0.944794	0.625602	-0.905833	-0.970584	-0.897021	-0.988083	-0.974661	-0.946252	-0.964328	-0.951147	-0.973547	-0.859432
21	Nox4	0.974802	0.972258	0.956832	0.95907	0.966197	0.972775	0.941234	0.964948	0.947913	0.968656	0.959133	0.971493	0.970525	0.972718	0.963972	0.962799	0.938553	0.943986	0.956884	0.960665	1	0.951631	0.979033	0.940149	0.879021	0.95972	0.942836	0.879777	0.949804	0.954051	0.927111	0.967541	0.970475	0.903858	0.984203	0.975072	0.922041	0.604907	-0.886147	-0.952916	-0.85492	-0.963004	-0.934462	-0.91331	-0.906241	-0.937847	-0.954871	-0.867674
22	Zfp37	0.980498	0.984332	0.989844	0.97123	0.982476	0.983079	0.957492	0.976701	0.963403	0.980874	0.983934	0.980604	0.98557	0.973061	0.976646	0.974885	0.962256	0.956566	0.980426	0.979269	0.951631	1	0.950124	0.97638	0.959424	0.908221	0.970473	0.913458	0.879183	0.979202	0.954194	0.984686	0.94439	0.841443	0.951514	0.990817	0.9429	0.682841	-0.920735	-0.957482	-0.872965	-0.97456	-0.972329	-0.963526	-0.917278	-0.939321	-0.969035	-0.881884
23	Inmt	0.982851	0.981146	0.966118	0.979363	0.976825	0.981793	0.970365	0.97765	0.975271	0.97975	0.972489	0.980228	0.979006	0.986525	0.980579	0.980761	0.969867	0.976286	0.976237	0.981852	0.979033	0.950124	1	0.969084	0.85097	0.922711	0.963745	0.924977	0.957528	0.97752	0.925279	0.978518	0.964441	0.851203	0.96983	0.97242	0.942846	0.635653	-0.893798	-0.969425	-0.860412	-0.982077	-0.942053	-0.93128	-0.939344	-0.956981	-0.954805	-0.853878
24	RGD1310209	0.984522	0.984425	0.989258	0.989393	0.985513	0.98472	0.982811	0.988548	0.986003	0.985182	0.978515	0.982248	0.986369	0.986413	0.987195	0.991628	0.981523	0.971366	0.991718	0.994294	0.940149	0.97638	0.969084	1	0.892835	0.877965	0.985487	0.961206	0.872158	0.990118	0.964656	0.985344	0.942408	0.789909	0.928069	0.972854	0.954821	0.601878	-0.923429	-0.977738	-0.905767	-0.981315	-0.967386	-0.943056	-0.947572	-0.926991	-0.978314	-0.855064
25	Lrtm2	0.892962	0.900356	0.915208	0.896178	0.89545	0.902661	0.890513	0.896517	0.894155	0.890896	0.909418	0.890715	0.902828	0.901249	0.896299	0.899228	0.857535	0.843806	0.906751	0.904696	0.879021	0.959424	0.85097	0.892835	1	0.868304	0.880971	0.775756	0.773617	0.888506	0.8979	0.898082	0.871783	0.814803	0.893029	0.947231	0.822469	0.690088	-0.845814	-0.842064	-0.82457	-0.886613	-0.932089	-0.92121	-0.856467	-0.877471	-0.88236	-0.786626
26	Dusp1	0.910796	0.910166	0.897067	0.898326	0.902167	0.910681	0.886729	0.900213	0.894677	0.906225	0.880418	0.909544	0.906861	0.915497	0.908937	0.900316	0.857428	0.869452	0.899633	0.900612	0.95972	0.908221	0.922711	0.877965	0.868304	1	0.87473	0.78516	0.888923	0.885844	0.923668	0.912366	0.910223	0.898505	0.968205	0.936197	0.825758	0.539687	-0.789456	-0.888217	-0.786651	-0.885897	-0.867506	-0.916129	-0.869196	-0.869975	-0.917999	-0.772921
27	RGD1564865	0.990301	0.987376	0.993504	0.98903	0.990373	0.98492	0.974544	0.994792	0.978737	0.991979	0.986116	0.988989	0.987724	0.979687	0.99322	0.98403	0.991868	0.980987	0.992911	0.984836	0.942836	0.970473	0.963745	0.985487	0.880971	0.87473	1	0.966004	0.882466	0.990985	0.941725	0.981405	0.960119	0.751906	0.934844	0.969955	0.970153	0.632489	-0.91258	-0.979509	-0.889767	-0.981655	-0.976781	-0.936177	-0.948807	-0.94293	-0.978496	-0.917896
28	Hrasls	0.955677	0.954676	0.955804	0.938233	0.962604	0.952908	0.916528	0.94775	0.925599	0.959774	0.944771	0.957753	0.954523	0.929825	0.949656	0.936045	0.975864	0.960661	0.942207	0.943882	0.879777	0.913458	0.924977	0.961206	0.775756	0.78516	0.966004	1	0.831378	0.966421	0.904881	0.95345	0.896862	0.696501	0.849294	0.902151	0.972686	0.523336	-0.883676	-0.977318	-0.819065	-0.957361	-0.903364	-0.860049	-0.879918	-0.858356	-0.956521	-0.897847
29	Mup5	0.92289	0.92211	0.890098	0.895196	0.912359	0.918615	0.875544	0.901198	0.881669	0.918174	0.920718	0.923248	0.918953	0.908614	0.908785	0.902729	0.900693	0.934127	0.895963	0.901961	0.949804	0.879183	0.957528	0.872158	0.773617	0.888923	0.882466	0.831378	1	0.911829	0.807158	0.921381	0.908374	0.855991	0.949006	0.909515	0.892853	0.720429	-0.81903	-0.899672	-0.730915	-0.925842	-0.853032	-0.877008	-0.845961	-0.947751	-0.863333	-0.835027
30	Mettl7b	0.995164	0.995482	0.993887	0.984789	0.996515	0.994943	0.968892	0.9896	0.974321	0.995195	0.993082	0.994616	0.996953	0.982302	0.994187	0.98716	0.99073	0.987206	0.989388	0.992053	0.954051	0.979202	0.97752	0.990118	0.888506	0.885844	0.990985	0.966421	0.911829	1	0.945975	0.995157	0.948306	0.799787	0.941053	0.977366	0.972157	0.650514	-0.907062	-0.984946	-0.859057	-0.994915	-0.962537	-0.944865	-0.940674	-0.949121	-0.978343	-0.903206
31	RGD1560784	0.947787	0.947085	0.955893	0.9506	0.948878	0.950747	0.943238	0.950043	0.947164	0.945978	0.921824	0.944221	0.951598	0.952474	0.955266	0.956368	0.917945	0.903432	0.952865	0.959991	0.927111	0.954194	0.925279	0.964656	0.8979	0.923668	0.941725	0.904881	0.807158	0.945975	1	0.95408	0.89885	0.807129	0.909726	0.950573	0.884419	0.461572	-0.850208	-0.942854	-0.875045	-0.930046	-0.922017	-0.926891	-0.925283	-0.852574	-0.979113	-0.791981
32	Ppp2r2a	0.995478	0.997162	0.993151	0.976792	0.99636	0.995156	0.958179	0.984447	0.965488	0.995792	0.988994	0.996522	0.997887	0.979498	0.987705	0.982303	0.982521	0.984282	0.983703	0.986741	0.967541	0.984686	0.978518	0.985344	0.898082	0.912366	0.981405	0.95345	0.921381	0.995157	0.95408	1	0.950148	0.844004	0.956615	0.981446	0.97162	0.645749	-0.916328	-0.988243	-0.854959	-0.990998	-0.952337	-0.952235	-0.920217	-0.941686	-0.983642	-0.898302
33	Socs2	0.970687	0.967609	0.960746	0.969301	0.963895	0.96556	0.956769	0.973348	0.965237	0.969443	0.96274	0.968636	0.959306	0.975855	0.961113	0.956728	0.961391	0.951236	0.965747	0.953996	0.970475	0.94439	0.964441	0.942408	0.871783	0.910223	0.960119	0.896862	0.908374	0.948306	0.89885	0.950148	1	0.838136	0.967679	0.969441	0.940354	0.629363	-0.929724	-0.952406	-0.897586	-0.959553	-0.966898	-0.897797	-0.905357	-0.934834	-0.945533	-0.898772
34	Cdh17	0.831603	0.841129	0.807408	0.789162	0.826279	0.84473	0.769787	0.794855	0.786437	0.823293	0.815299	0.833313	0.83346	0.83446	0.794236	0.80377	0.772105	0.78677	0.788829	0.811121	0.903858	0.841443	0.851203	0.789909	0.814803	0.898505	0.751906	0.696501	0.855991	0.799787	0.807129	0.844004	0.838136	1	0.886769	0.864639	0.775523	0.521602	-0.79842	-0.817491	-0.688927	-0.831511	-0.765122	-0.786787	-0.689718	-0.772794	-0.816208	-0.693374
35	Mme	0.960666	0.960102	0.948852	0.951423	0.951781	0.955724	0.939876	0.955284	0.946186	0.959305	0.950182	0.960619	0.955337	0.961363	0.953472	0.9504	0.93112	0.945589	0.955004	0.947256	0.984203	0.951514	0.96983	0.928069	0.893029	0.968205	0.934844	0.849294	0.949006	0.941053	0.909726	0.956615	0.967679	0.886769	1	0.973994	0.908655	0.687364	-0.886996	-0.93418	-0.849814	-0.944375	-0.934662	-0.950659	-0.901999	-0.953925	-0.93529	-0.852315
36	RGD1308116	0.98477	0.98652	0.984371	0.982406	0.982696	0.987941	0.972495	0.982945	0.978343	0.982256	0.984008	0.982488	0.98517	0.988644	0.984055	0.981712	0.962969	0.957223	0.984686	0.985229	0.975072	0.990817	0.97242	0.972854	0.947231	0.936197	0.969955	0.902151	0.909515	0.977366	0.950573	0.981446	0.969441	0.864639	0.973994	1	0.93253	0.670785	-0.90915	-0.95644	-0.878694	-0.980196	-0.977955	-0.957268	-0.938505	-0.954536	-0.966313	-0.873639
37	RGD1306105	0.974246	0.975348	0.971924	0.943026	0.977683	0.967469	0.915016	0.960146	0.926475	0.979584	0.97224	0.979556	0.971571	0.940647	0.953199	0.941403	0.986403	0.984661	0.952802	0.944794	0.922041	0.9429	0.942846	0.954821	0.822469	0.825758	0.970153	0.972686	0.892853	0.972157	0.884419	0.97162	0.940354	0.775523	0.908655	0.93253	1	0.648293	-0.940234	-0.984717	-0.831516	-0.970908	-0.925803	-0.89093	-0.853475	-0.907672	-0.954671	-0.94584
38	RT1-CE5	0.636823	0.64797	0.646095	0.625727	0.635285	0.631448	0.620086	0.631731	0.619698	0.645835	0.704033	0.645988	0.64405	0.615636	0.631392	0.625502	0.654169	0.698681	0.651865	0.625602	0.604907	0.682841	0.635653	0.601878	0.690088	0.539687	0.632489	0.523336	0.720429	0.650514	0.461572	0.645749	0.629363	0.521602	0.687364	0.670785	0.648293	1	-0.643847	-0.57258	-0.493613	-0.65313	-0.670962	-0.735179	-0.580533	-0.801599	-0.525516	-0.647274
39	Pcdh17	-0.920531	-0.923147	-0.929004	-0.913549	-0.919464	-0.913	-0.902226	-0.923613	-0.910318	-0.926845	-0.92482	-0.923649	-0.916763	-0.91788	-0.891983	-0.911825	-0.928991	-0.921262	-0.921268	-0.905833	-0.886147	-0.920735	-0.893798	-0.923429	-0.845814	-0.789456	-0.91258	-0.883676	-0.81903	-0.907062	-0.850208	-0.916328	-0.929724	-0.79842	-0.886996	-0.90915	-0.940234	-0.643847	1	0.922383	0.916879	0.911044	0.92294	0.858963	0.797249	0.866426	0.897112	0.841958
40	Cyp2c12	-0.9888	-0.988853	-0.983517	-0.96605	-0.990749	-0.985649	-0.943999	-0.976548	-0.954689	-0.991163	-0.972872	-0.991339	-0.986159	-0.968356	-0.975693	-0.965939	-0.987238	-0.982695	-0.970797	-0.970584	-0.952916	-0.957482	-0.969425	-0.977738	-0.842064	-0.888217	-0.979509	-0.977318	-0.899672	-0.984946	-0.942854	-0.988243	-0.952406	-0.817491	-0.93418	-0.95644	-0.984717	-0.57258	0.922383	1	0.853301	0.981857	0.933942	0.914418	0.896275	0.904243	0.98699	0.911004
41	Abcg8	-0.873919	-0.864827	-0.886884	-0.919944	-0.862912	-0.861608	-0.931398	-0.913462	-0.924408	-0.873477	-0.864365	-0.863954	-0.866924	-0.911604	-0.878879	-0.916076	-0.865667	-0.843101	-0.913766	-0.897021	-0.85492	-0.872965	-0.860412	-0.905767	-0.82457	-0.786651	-0.889767	-0.819065	-0.730915	-0.859057	-0.875045	-0.854959	-0.897586	-0.688927	-0.849814	-0.878694	-0.831516	-0.493613	0.916879	0.853301	1	0.847943	0.927374	0.829243	0.876455	0.837015	0.868996	0.71886
42	Cyp17a1	-0.99429	-0.995642	-0.98729	-0.980443	-0.995137	-0.997202	-0.963353	-0.984484	-0.971102	-0.992346	-0.994455	-0.993326	-0.994644	-0.984472	-0.988511	-0.981269	-0.988505	-0.982813	-0.981679	-0.988083	-0.963004	-0.97456	-0.982077	-0.981315	-0.886613	-0.885897	-0.981655	-0.957361	-0.925842	-0.994915	-0.930046	-0.990998	-0.959553	-0.831511	-0.944375	-0.980196	-0.970908	-0.65313	0.911044	0.981857	0.847943	1	0.960691	0.92561	0.927532	0.948761	0.969418	0.907064
43	Abcd2	-0.967842	-0.965579	-0.976515	-0.985081	-0.964917	-0.965679	-0.980668	-0.984074	-0.981846	-0.96685	-0.975395	-0.962747	-0.965149	-0.978923	-0.974496	-0.976915	-0.962056	-0.943031	-0.985253	-0.974661	-0.934462	-0.972329	-0.942053	-0.967386	-0.932089	-0.867506	-0.976781	-0.903364	-0.853032	-0.962537	-0.922017	-0.952337	-0.966898	-0.765122	-0.934662	-0.977955	-0.925803	-0.670962	0.92294	0.933942	0.927374	0.960691	1	0.927599	0.948184	0.948858	0.94409	0.878183
44	Ccna2	-0.938895	-0.94284	-0.950152	-0.941042	-0.938521	-0.936432	-0.938265	-0.94057	-0.940363	-0.94406	-0.939429	-0.941793	-0.943782	-0.935906	-0.947806	-0.944109	-0.924559	-0.93985	-0.955915	-0.946252	-0.91331	-0.963526	-0.93128	-0.943056	-0.92121	-0.916129	-0.936177	-0.860049	-0.877008	-0.944865	-0.926891	-0.952235	-0.897797	-0.786787	-0.950659	-0.957268	-0.89093	-0.735179	0.858963	0.914418	0.829243	0.92561	0.927599	1	0.91659	0.940096	0.926417	0.808622
45	Asns	-0.93321	-0.925717	-0.932406	-0.970396	-0.926536	-0.932011	-0.977599	-0.956574	-0.971124	-0.927853	-0.927405	-0.922607	-0.931489	-0.958138	-0.965626	-0.966369	-0.920873	-0.909431	-0.962743	-0.964328	-0.906241	-0.917278	-0.939344	-0.947572	-0.856467	-0.869196	-0.948807	-0.879918	-0.845961	-0.940674	-0.925283	-0.920217	-0.905357	-0.689718	-0.901999	-0.938505	-0.853475	-0.580533	0.797249	0.896275	0.876455	0.927532	0.948184	0.91659	1	0.931496	0.917299	0.781179
46	LOC685203	-0.949404	-0.947234	-0.941603	-0.954735	-0.940966	-0.943518	-0.947922	-0.954483	-0.946034	-0.947304	-0.965193	-0.946114	-0.948497	-0.949671	-0.955447	-0.955631	-0.939038	-0.954592	-0.958384	-0.951147	-0.937847	-0.939321	-0.956981	-0.926991	-0.877471	-0.869975	-0.94293	-0.858356	-0.947751	-0.949121	-0.852574	-0.941686	-0.934834	-0.772794	-0.953925	-0.954536	-0.907672	-0.801599	0.866426	0.904243	0.837015	0.948761	0.948858	0.940096	0.931496	1	0.889683	0.858643
47	A2m	-0.984343	-0.983326	-0.985857	-0.969166	-0.986195	-0.982795	-0.949515	-0.977984	-0.9582	-0.984835	-0.963212	-0.984379	-0.983541	-0.969991	-0.979651	-0.96947	-0.968562	-0.956607	-0.973563	-0.973547	-0.954871	-0.969035	-0.954805	-0.978314	-0.88236	-0.917999	-0.978496	-0.956521	-0.863333	-0.978343	-0.979113	-0.983642	-0.945533	-0.816208	-0.93529	-0.966313	-0.954671	-0.525516	0.897112	0.98699	0.868996	0.969418	0.94409	0.926417	0.917299	0.889683	1	0.892102
48	Lum	-0.915647	-0.914586	-0.912826	-0.866179	-0.920059	-0.906255	-0.820779	-0.895942	-0.835776	-0.9195	-0.920534	-0.921865	-0.909306	-0.858824	-0.893468	-0.854633	-0.922587	-0.913141	-0.878559	-0.859432	-0.867674	-0.881884	-0.853878	-0.855064	-0.786626	-0.772921	-0.917896	-0.897847	-0.835027	-0.903206	-0.791981	-0.898302	-0.898772	-0.693374	-0.852315	-0.873639	-0.94584	-0.647274	0.841958	0.911004	0.71886	0.907064	0.878183	0.808622	0.781179	0.858643	0.892102	1
49	S100g	-0.751424	-0.730638	-0.745183	-0.749181	-0.735714	-0.718869	-0.719889	-0.772785	-0.713727	-0.750085	-0.737953	-0.745653	-0.735809	-0.717344	-0.764947	-0.735368	-0.731919	-0.735433	-0.753622	-0.712282	-0.748851	-0.698357	-0.711017	-0.685179	-0.622273	-0.707122	-0.782953	-0.682319	-0.706633	-0.726188	-0.668089	-0.712606	-0.76656	-0.448908	-0.752667	-0.715032	-0.722385	-0.509717	0.619049	0.712649	0.685982	0.7029	0.758141	0.694823	0.757918	0.773531	0.733462	0.817948
50	Cxcl13	-0.897539	-0.90115	-0.913935	-0.893381	-0.902921	-0.907866	-0.878126	-0.896352	-0.882769	-0.893321	-0.907362	-0.894189	-0.905817	-0.889618	-0.914783	-0.890701	-0.865313	-0.844867	-0.90137	-0.902566	-0.868258	-0.938689	-0.846723	-0.882742	-0.956796	-0.862942	-0.898557	-0.809862	-0.770483	-0.900033	-0.900237	-0.895561	-0.854473	-0.736391	-0.867916	-0.932408	-0.821154	-0.632025	0.752969	0.848331	0.747988	0.893404	0.916881	0.901657	0.890951	0.869205	0.896681	0.837907
51	Acsm2	-0.976113	-0.975923	-0.989747	-0.968294	-0.978244	-0.972659	-0.950675	-0.978532	-0.956696	-0.978384	-0.969979	-0.976201	-0.977058	-0.962388	-0.974686	-0.965865	-0.961757	-0.947275	-0.977813	-0.96707	-0.937827	-0.985678	-0.929574	-0.970226	-0.93507	-0.899318	-0.980488	-0.927268	-0.83773	-0.970417	-0.962038	-0.972895	-0.94609	-0.785355	-0.934769	-0.973965	-0.945394	-0.613845	0.912429	0.961229	0.889128	0.957998	0.972296	0.945	0.917184	0.910906	0.982319	0.906983
52	Cyfip2	-0.978127	-0.979108	-0.972236	-0.949897	-0.983069	-0.981354	-0.922443	-0.9606	-0.931092	-0.976027	-0.976686	-0.978196	-0.981918	-0.948966	-0.972947	-0.954421	-0.972878	-0.965666	-0.954369	-0.964877	-0.93038	-0.952194	-0.949395	-0.960466	-0.850917	-0.847259	-0.969643	-0.968719	-0.895481	-0.985554	-0.916632	-0.978139	-0.913361	-0.778691	-0.897638	-0.946825	-0.965146	-0.608466	0.859028	0.972747	0.784234	0.985054	0.92412	0.893949	0.903037	0.912967	0.962949	0.924694
53	Tox	-0.989507	-0.988822	-0.985445	-0.978661	-0.989384	-0.992844	-0.960027	-0.983428	-0.965372	-0.98462	-0.988587	-0.985688	-0.991349	-0.980059	-0.990838	-0.980374	-0.970363	-0.959725	-0.979224	-0.985972	-0.964985	-0.97835	-0.966903	-0.972134	-0.912915	-0.901228	-0.979569	-0.935907	-0.905484	-0.987983	-0.944058	-0.98319	-0.951482	-0.819286	-0.94155	-0.983925	-0.945558	-0.629586	0.876844	0.964699	0.845704	0.989809	0.967066	0.924417	0.943835	0.945333	0.971896	0.907942
54	Aqp7	-0.98277	-0.984412	-0.987779	-0.957019	-0.986724	-0.982638	-0.931768	-0.970392	-0.941605	-0.983746	-0.970394	-0.984742	-0.98549	-0.957923	-0.974731	-0.95981	-0.963434	-0.955276	-0.966817	-0.966019	-0.951129	-0.981377	-0.942161	-0.967937	-0.911034	-0.914634	-0.973423	-0.943066	-0.867642	-0.978194	-0.966566	-0.986111	-0.935444	-0.825559	-0.936321	-0.97051	-0.956642	-0.585122	0.892654	0.978294	0.837846	0.969766	0.942913	0.936783	0.898961	0.899103	0.992451	0.914715
55	Psat1	-0.980482	-0.978377	-0.97424	-0.988859	-0.974537	-0.98241	-0.983137	-0.985105	-0.985629	-0.974807	-0.975416	-0.974261	-0.978527	-0.994184	-0.985954	-0.987871	-0.955499	-0.947818	-0.984717	-0.988027	-0.979575	-0.973391	-0.97948	-0.970191	-0.922341	-0.93564	-0.967399	-0.896245	-0.913335	-0.971548	-0.948725	-0.970894	-0.971468	-0.848732	-0.970182	-0.993188	-0.915528	-0.630576	0.890049	0.947967	0.894965	0.975357	0.977215	0.938769	0.961316	0.956602	0.959567	0.851833
56	RGD1566215	-0.990197	-0.991592	-0.994472	-0.973541	-0.992802	-0.991711	-0.953037	-0.982721	-0.961574	-0.989645	-0.983094	-0.990045	-0.992052	-0.975656	-0.984026	-0.974466	-0.972733	-0.960267	-0.979624	-0.979937	-0.960194	-0.990093	-0.954596	-0.978755	-0.927436	-0.911804	-0.981324	-0.943562	-0.875728	-0.9851	-0.965743	-0.989128	-0.954008	-0.834501	-0.944157	-0.984569	-0.958777	-0.604722	0.911594	0.97854	0.866035	0.981744	0.965773	0.937336	0.917053	0.917755	0.990517	0.911734
57	Nfe2	-0.911597	-0.903602	-0.93214	-0.942532	-0.905532	-0.901753	-0.940437	-0.94423	-0.93433	-0.9102	-0.912847	-0.902727	-0.909839	-0.925179	-0.926785	-0.937155	-0.89398	-0.869139	-0.944337	-0.92475	-0.878594	-0.928162	-0.866306	-0.920969	-0.909993	-0.826855	-0.935953	-0.841399	-0.752557	-0.90273	-0.907248	-0.892609	-0.908816	-0.671784	-0.877413	-0.923545	-0.856043	-0.58297	0.874061	0.870607	0.94731	0.885073	0.969133	0.88547	0.924088	0.888678	0.907774	0.822221
58	Elovl6	-0.985437	-0.989938	-0.988973	-0.969394	-0.987364	-0.986989	-0.952866	-0.976866	-0.963126	-0.987422	-0.986928	-0.987893	-0.985798	-0.97563	-0.972622	-0.967722	-0.97604	-0.970399	-0.977273	-0.973052	-0.959462	-0.991258	-0.960335	-0.972364	-0.933366	-0.905827	-0.971379	-0.925523	-0.897991	-0.978416	-0.935072	-0.985624	-0.96754	-0.861517	-0.960252	-0.988479	-0.965005	-0.685156	0.946507	0.972127	0.869427	0.981481	0.96868	0.948089	0.895035	0.936292	0.968911	0.905074
59	RGD1562284	-0.953277	-0.946984	-0.95657	-0.980597	-0.9471	-0.94937	-0.981472	-0.974301	-0.981237	-0.950904	-0.941712	-0.946099	-0.946509	-0.973445	-0.97247	-0.968857	-0.938341	-0.920165	-0.975984	-0.965523	-0.936788	-0.944537	-0.942691	-0.953906	-0.897034	-0.912617	-0.965392	-0.884073	-0.842102	-0.944527	-0.945791	-0.935209	-0.957056	-0.746679	-0.939951	-0.964919	-0.884164	-0.575486	0.858243	0.922605	0.915394	0.935904	0.976071	0.928174	0.976042	0.924852	0.949281	0.834583
60	Abcc3	-0.98358	-0.982975	-0.981336	-0.984035	-0.982377	-0.980457	-0.973903	-0.986095	-0.978312	-0.984835	-0.989356	-0.982413	-0.980959	-0.980827	-0.979238	-0.980795	-0.992731	-0.986817	-0.985513	-0.981553	-0.93974	-0.961478	-0.97324	-0.981213	-0.866626	-0.844707	-0.984162	-0.956008	-0.908578	-0.985325	-0.903597	-0.975446	-0.963531	-0.778999	-0.93263	-0.965413	-0.974449	-0.686515	0.943612	0.971446	0.892649	0.986553	0.972019	0.92081	0.927235	0.95686	0.94917	0.896418
61	Elovl6	-0.990023	-0.993263	-0.984385	-0.96996	-0.989798	-0.990152	-0.952328	-0.977255	-0.963235	-0.991232	-0.984685	-0.992611	-0.98821	-0.979277	-0.974546	-0.969682	-0.980109	-0.981171	-0.975364	-0.974282	-0.974009	-0.978435	-0.979356	-0.971768	-0.897104	-0.918803	-0.969458	-0.934198	-0.930276	-0.981137	-0.931578	-0.990301	-0.972824	-0.87895	-0.970546	-0.983475	-0.971917	-0.665014	0.941056	0.983618	0.859081	0.986527	0.953003	0.941294	0.89464	0.939137	0.971113	0.90078
62	Akr1b7	-0.981063	-0.980619	-0.97997	-0.976901	-0.976906	-0.978945	-0.965024	-0.981452	-0.967069	-0.978465	-0.982644	-0.977643	-0.983478	-0.980642	-0.971164	-0.985723	-0.963078	-0.961931	-0.97964	-0.98204	-0.964033	-0.977873	-0.967433	-0.977645	-0.90926	-0.8835	-0.965226	-0.918387	-0.907936	-0.975644	-0.931361	-0.979836	-0.953929	-0.848045	-0.948155	-0.976495	-0.951252	-0.659615	0.949646	0.960205	0.913966	0.97627	0.966907	0.926837	0.91362	0.94856	0.954665	0.863581
[truncated: 14 more columns]
